# Supplementary material
Source: PubMed Central journal article supplement (PMC6081640)
Supplement: NIHMS971684-supplement-Sup1.pdf [file NIHMS971684-supplement-Sup1.pdf]

## Supporting Information

1  
2  
3  
4  
5  
6  
7  
8  
9  
10  
11  
12  
13  
14  
15  
16

Agglomeration of *Escherichia coli* with positively charged nanoparticles can lead to artifacts in a standard *Caenorhabditis elegans* toxicity assay

Shannon K. Hanna<sup>##</sup>, Antonio Montoro Bustos, Alexander W. Peterson, Vytas Reipa, Leona D. Scanlan<sup>†</sup>, Sanem Hosbas Coskun, Tae Joon Cho, Monique E. Johnson, Vincent A. Hackley, Bryant C. Nelson, Michael R. Winchester, John T. Elliott, Elijah J. Petersen

Materials Measurement Laboratory, National Institute of Standards and Technology, 100 Bureau Drive, Gaithersburg, MD 20899-8313

<sup>#</sup> Current address: Center for Tobacco Products, Food and Drug Administration, 10903 New Hampshire Avenue, Silver Spring, MD 20993

<sup>†</sup> Current address: Department of Pesticide Regulation, California Environmental Protection Agency, 1001 I Street, Sacramento, CA 95814

\* Corresponding author: hanna.shannonk@gmail.com

**8 pages total, 2 figures and 2 tables**

## 17 **Supplemental methods**

### 18 **Zeta Potential and Dynamic Light Scattering Measurements**

19 Zeta potential (Z-P) measurements were operated in 173° backscatter mode with a laser  
20 wavelength of 633 nm using a palladium dip cell with disposable cuvettes (Brandtech, Inc.,  
21 Essex, CT) and applying the Smoluchowski equation for thin double layers. Measurements were  
22 taken in DI water or half-strength M9, the medium used in ISO 10872 and described in the main  
23 text. Most samples were diluted 10:1 (v/v) so that the final concentration was  $\approx 5$  mg/L. The  
24 medium was filtered first using a 0.8/0.2  $\mu\text{m}$  polyethersulfone syringe filter (Acrodisc<sup>R</sup> PF,  
25 PALL Cooperation, Ann Arbor, MI) to remove particles that could interfere with the zeta  
26 potential measurements. Triplicate samples were analyzed for each particle tested, and each  
27 sample was measured three times (each measurement was conducted with up to 100 sub-runs).  
28 Agglomeration was observed for some samples after the Z-P measurements as indicated by a  
29 change in color of the suspension in the cuvette. For these samples, the number of sub-runs was  
30 decreased to a maximum of 30. Outlier results (less than 2 % of total ZP measurements) were  
31 removed using the Grubb's test (GraphPad Prism). Batch mode DLS procedures followed NIST-  
32 NCL Protocol<sup>1</sup> to measure the z-average diameter. Samples for DLS measurements were  
33 prepared similarly except the size was only measured in DI water. Five measurements were  
34 made of a single sample (each measurement was conducted with 11 up to 100 sub-runs). Z-P and  
35 z-average size were reported as a mean of no less than three (for Z-P) and five measurements  
36 (for DLS) plus or minus one standard deviation for each replicate; triplicate replicates were  
37 tested for each Z-P measurement while a single replicate was measured for the DLS  
38 measurements. All Z-P and DLS measurements were conducted at  $(20 \pm 0.1)$  °C unless noted  
39 otherwise.

### 40 **Axenic Medium**

41 Axenic medium was prepared in a sterile hood as described by Samuel et al.<sup>2</sup> and frozen for later  
42 use. Components are listed in Table S1. Double concentrated axenic medium (2X) was prepared  
43 by eliminating half of the sterile, deionized water from the ingredients.

### 44 **ISO assay (modified and reprinted with permission from Hanna et al.<sup>3</sup>)**

45 The test wells were prepared by adding 500  $\mu\text{L}$  of the test material and 500  $\mu\text{L}$  of the *E. coli*  
46 suspension to each well. J1 nematodes for the toxicity tests were obtained using a standard  
47 bleaching protocol in which a mixed culture of nematodes was exposed to a sodium hypochlorite  
48 and sodium hydroxide mixture for 10 min, washed with sterile water three times and the eggs  
49 were allowed to hatch in sterile water overnight. Bleached nematodes were only J1 stage, as  
50 development is arrested when a food source is absent. Ten J1 nematodes were added to each well  
51 of a 12-well plate and the test was initiated by placing the plates into a 20 °C incubator, in the  
52 dark, and leaving them undisturbed for 96 h. All J1 nematodes not used in the test were stained  
53 with Rose Bengal (500  $\mu\text{L}$  of a 300 mg L<sup>-1</sup> stock was added to 5 mL), heated at 80 °C for 10 min

54 to kill and straighten them, 30 individuals were measured, as described in the following section,  
55 to determine the initial nematode length. At the end of the assay, 200  $\mu\text{L}$  of a 300  $\text{mg L}^{-1}$  stock of  
56 Rose Bengal was added to each well and the plate was heated at 80  $^{\circ}\text{C}$  for 10 min to kill and  
57 straighten all of the nematodes. Plates were allowed to cool for at least 1 h prior to imaging. All  
58 plates were stored at 4  $^{\circ}\text{C}$  and imaged within one week after the experiment concluded. Details  
59 for imaging of the wells after the ISO and axenic assays, and calculation of the percentage  
60 inhibition for growth and reproduction and provided in the following sections.

61 **Imaging optimization and processing, nematode length measurements, and reproductive**  
62 **counts (*modified and reprinted with permission from Hanna et al.*<sup>3</sup>)**

63 Whole-well imaging improved the reliability of nematode measurements by providing a system  
64 by which a line can be placed on each nematode and their length determined through software  
65 instead of manually estimating length based on a scale bar under a microscope. However, whole-  
66 well imaging also introduced additional sources of variability and required optimization of  
67 various parameters. We optimized the amount of Rose Bengal to add to the wells by adding  
68 increasing concentrations to wells and measuring the difference in intensity between a nematode  
69 and the background. We achieved the greatest contrast at 60  $\text{mg L}^{-1}$  of Rose Bengal. We imaged  
70 each well of the 12-well plates using a CoolSNAPHQ2 CCD camera (Photometrics, Tucson, AZ)  
71 coupled to an automated Zeiss microscope (Axio Vert.A1, Carl Zeiss Microscopy, Oberkochen,  
72 Germany) with Zen software (Carl Zeiss Microscopy, 2012 Blue Edition). The microscope was  
73 calibrated using a stage micrometer (Electron Microscopy Services) at 5 x prior to the study.  
74 Transmitted light intensity was set to 3.7 V and exposure time was 2 ms. Whole-well imaging  
75 was improved by addition of 1 mL of light paraffin oil (Taylor Scientific, St. Louis, MO, USA)  
76 to the top of the well, which reduced darkening generated by the water meniscus. The plate was  
77 calibrated by finding and focusing on the edges of the wells. A focus surface was defined by  
78 fixing five points in each well. While adding additional points would improve focus, we found  
79 that five points provided sufficient focus to allow identification and measurement of worms.  
80 Using the calibration and focal points, entire wells were imaged (see Fig. 2). Images were  
81 exported as .tiff files and adult hermaphrodites were measured (males, if present, were excluded)  
82 and young were counted using ImageJ (1.47v, Wayne Rasband, NIH, USA) with the scale based  
83 on the stage micrometer calibration. Total nematode length was measured using a segmented line  
84 tracing the center of the nematode from the tip of the head to the end of the tail. Young were  
85 counted in one quarter of each well to estimate total well reproduction. While issues such as  
86 stitching, poor focus, and interferences may impact image quality, the automated imaging system  
87 helped to overcome many of those problems and increased the quality of our data as discussed in  
88 depth in Hanna et al. 2016.<sup>3</sup>

89 **Calculation of growth and reproduction inhibition (*modified and reprinted with***  
90 **permission from Hanna et al.**<sup>3</sup>)

91 Mean growth of nematodes in each well was calculated by subtracting the mean length of adult  
92 hermaphrodites by the mean length of J1 nematodes measured at the start of the assay. Inhibition  
93 of growth ( $G_I$ ) was calculated for each nematode as follows:

$$G_I = 100 - \frac{L_F - L_I}{G} * 100$$

94 where  $L_F$  is final length of the individual nematode at the end of the assay,  $L_I$  is the mean initial  
95  $J_1$  length at the start of the assay, and  $G$  is the mean growth of the control nematodes during the  
96 assay. Inhibition of reproduction ( $R_I$ ) was calculated for each well as follows:

$$R_I = \frac{R_C - R_W}{R_C} * 100$$

97 where  $R_C$  is the mean reproduction per adult hermaphrodite found for the control wells and  $R_W$  is  
98 the reproduction per adult hermaphrodite found in the test well. EC50 for growth and  
99 reproduction was determined using a four-parameter logistic function in GraphPad Prism (V  
100 6.04, GraphPad Software, Inc.).

101

## 102 **Reference**

103 1. V. A. Hackley and J. D. Clogston, Measuring the size of nanoparticles in aqueous media using  
104 batch-mode dynamic light scattering. NIST-NCL Joint Assay Protocol, PCC-1. Version 1.2.  
105 <http://dx.doi.org/10.6028/NIST.SP.1200-6>, 2015.

106 2. T. K. Samuel, J. W. Sinclair, K. L. Pinter and I. Hamza, Culturing *Caenorhabditis elegans* in  
107 axenic liquid media and creation of transgenic worms by microparticle bombardment. *J. Vis.*  
108 *Exp.* **2014**, (90), e51796.

109 3. Hanna, S. K.; Cooksey, G. A.; Dong, S.; Nelson, B. C.; Mao, L.; Elliott, J. T.; Petersen, E. J.,  
110 Feasibility of using a standardized *Caenorhabditis elegans* toxicity test to assess nanomaterial  
111 toxicity. *Environmental Science: Nano* **2016**, 3, 1080-1089.

112 PS ENPs

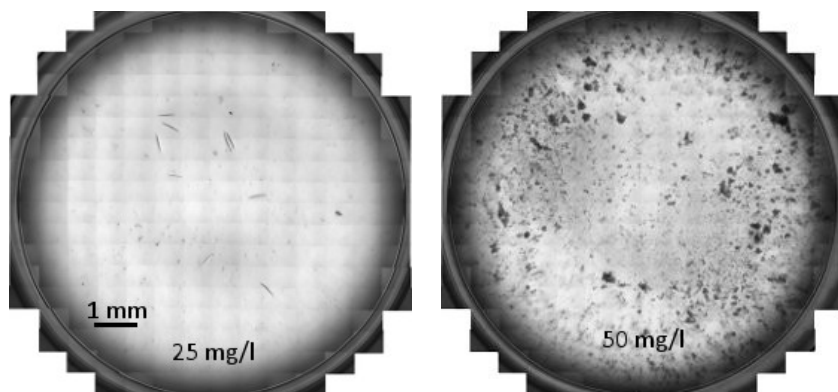

113

114 30 nm bPEI Au ENPs

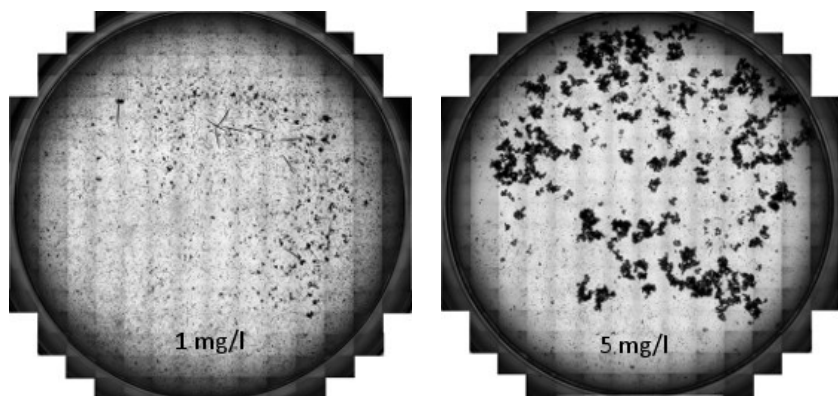

115

116 Figure S1. Positively charged ENPs such as 30 nm bPEI Au ENPs and PS ENPs produced large  
117 agglomerates, which appeared to increase with increasing concentration of ENPs. These images  
118 were taken of wells from the 12-well plates after conducting the ISO assay.

119

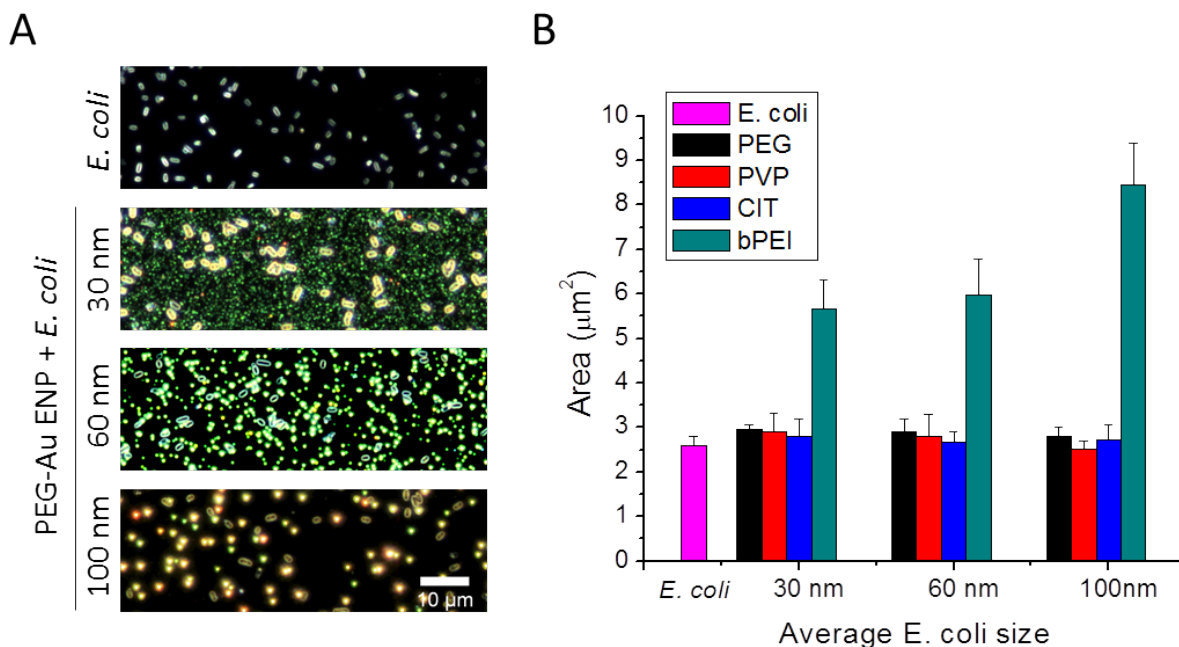

120  
 121 Figure S2. Enhanced darkfield imaging of neutral or negatively charged coated Au ENPs  
 122 incubated with *E. coli* reveals no observable interaction or aggregation. A) Representative  
 123 images of *E. coli* alone and exposed to PEG coated Au ENPs of size 30, 60, and 100 nm  
 124 diameter. Visual inspection reveals both *E. coli* and Au ENPs remain as single dispersed  
 125 particles with no noticeable interactions. A scale bar of 10  $\mu\text{m}$  is provided in the lower right  
 126 corner. B) Image analysis of bacteria size results in average area of *E. coli* reported for each Au  
 127 ENP size (30 nm, 60 nm, 100 nm) and coating (PEG, PVP, CIT, bPEI). No observable change in  
 128 *E. coli* size/aggregation is observed, within the error of measurement, for the neutral/negatively  
 129 charged gold particle coatings: PEG, PVP, or CIT. In contrast, the positively charged bPEI  
 130 coated Au ENPs show an immediate change in average bacteria particle (agglomerate) size at the  
 131 0 min time point after mixing shown here. Error bars represent 1 standard deviation.

132

133

134 Table S1. Composition of Axenic Medium (as described by Samuel et al.<sup>2</sup>)

| <b>Component</b>                                                                                        | <b>Volume</b> |
|---------------------------------------------------------------------------------------------------------|---------------|
| Choline diacid citrate (2 mM)                                                                           | 10 mL         |
| Vitamin and growth factor mix                                                                           | 10 mL         |
| <i>Solution 1</i>                                                                                       |               |
| <i>Sterile, deionized water</i>                                                                         | 60 mL         |
| <i>N-acetyl-<math>\alpha</math>-D-glucosamine</i>                                                       | 0.15 g        |
| <i>DL-alanine</i>                                                                                       | 0.15 g        |
| <i>Nicotinamide</i>                                                                                     | 0.075 g       |
| <i>D-pantethine</i>                                                                                     | 0.0375 g      |
| <i>DL-pantothenic acid, hemi calcium salt</i>                                                           | 0.075 g       |
| <i>Folic acid</i>                                                                                       | 0.075 g       |
| <i>Pyridoxamine 2HCl</i>                                                                                | 0.0375 g      |
| <i>Pyridoxine HCl</i>                                                                                   | 0.075 g       |
| <i>Flavin mononucleotide, sodium salt</i>                                                               | 0.075 g       |
| <i>Thiamine hydrochloride</i>                                                                           | 0.075 g       |
| <i>Solution 2</i>                                                                                       |               |
| <i>1 N KOH</i>                                                                                          | 5 mL          |
| <i>p-aminobenzoic acid</i>                                                                              | 0.075 g       |
| <i>D-biotin</i>                                                                                         | 0.0375 g      |
| <i>Cyanocobalamin (B12)</i>                                                                             | 0.0375 g      |
| <i>Folinic acid, calcium salt</i>                                                                       | 0.0375 g      |
| <i>Nicotinic acid</i>                                                                                   | 0.075 g       |
| <i>Pyridoxal 5-phosphate</i>                                                                            | 0.0375 g      |
| <i>Solution 3</i>                                                                                       |               |
| <i>Ethanol</i>                                                                                          | 1 mL          |
| <i>(<math>\pm</math>) <math>\alpha</math>-L-lipoic acid, oxidized form</i>                              | 0.0375 g      |
| <i>Combine solutions 1, 2, and 3 and bring the final volume to 100 mL with sterile, deionized water</i> |               |
| <i>myo</i> -Inositol (2.4 mM)                                                                           | 10 mL         |
| Hemin chloride (2 mM in 0.1 N NaOH pH 8.0)                                                              | 10 mL         |
| Sterile deionized water                                                                                 | 250 mL        |
| Nucleic acid mix:                                                                                       | 20 mL         |
| Sterile, deionized water                                                                                | 60 mL         |
| Adenosine 5' -monophosphate, sodium salt                                                                | 1.74 g        |
| Cytidine 5' -phosphate                                                                                  | 1.84 g        |
| Guanosine 2' - and 3' -monophosphate                                                                    | 1.82 g        |
| Bring solution to 100 mL                                                                                |               |
| Mineral Mix:                                                                                            | 100 mL        |
| MgCl <sub>2</sub> •6H <sub>2</sub> O                                                                    | 4.1 g         |
| Sodium citrate                                                                                          | 2.9 g         |
| Potassium citrate monohydrate                                                                           | 4.9 g         |
| CuCl <sub>2</sub> •2H <sub>2</sub> O                                                                    | 0.07 g        |
| MnCl <sub>2</sub> •4H <sub>2</sub> O                                                                    | 0.2 g         |

|                                                                                      |        |
|--------------------------------------------------------------------------------------|--------|
| ZnCl <sub>2</sub>                                                                    | 0.1 g  |
| Fe(NH <sub>4</sub> ) <sub>2</sub> (SO <sub>4</sub> ) <sub>2</sub> •6H <sub>2</sub> O | 0.6 g  |
| CaCl <sub>2</sub> •2H <sub>2</sub> O (add last)                                      | 0.2 g  |
| Lactalbumin enzymatic hydrolysate (170 mg/mL)                                        | 20 mL  |
| Essential Amino Acid Mix                                                             | 20 mL  |
| Non-essential Amino Acid Mix                                                         | 10 mL  |
| KH <sub>2</sub> PO <sub>4</sub> (450 mM)                                             | 20 mL  |
| D-Glucose (1.5 M)                                                                    | 50 mL  |
| HEPES, sodium salt (1 M)                                                             | 10 mL  |
| Sterile deionized water                                                              | 250 mL |
| Cholesterol (5 mg mL in ethanol)                                                     | 1 mL   |
| Ultra-pasteurized skim milk (add immediately before use)                             | 200 mL |

135



136 **Table S2.** Properties of ENPs tested

| Product Name                      | Surface coating | Size (nm)                                                       | Mass concentration of stock (mg L <sup>-1</sup> ) <sup>g</sup> | Zeta potential in DI Water <sup>h</sup> | Zeta potential in 50% M9 <sup>h</sup> |
|-----------------------------------|-----------------|-----------------------------------------------------------------|----------------------------------------------------------------|-----------------------------------------|---------------------------------------|
| 30 nm bPEI Au ENPs                | bPEI            | 30.9 ± 2.9 (TEM), <sup>a</sup> 45.0 ± 0.8 (DLS) <sup>b</sup>    | 52                                                             | 43.3 ± 4.4                              | 12.2 ± 2.0                            |
| 60 nm bPEI Au ENPs                | bPEI            | 63.7 ± 7.3 (TEM), <sup>a</sup> 91.1 ± 2.1 (DLS)                 | 52                                                             | 51.7 ± 1.5                              | 10.3 ± 1.4 <sup>i</sup>               |
| 100 nm bPEI Au ENPs               | bPEI            | 98.1 ± 10.1 (TEM), <sup>a</sup> 101 ± 2 (DLS)                   | 52                                                             | 57.4 ± 1.2                              | 12.2 ± 2.6                            |
| 30 nm Citrate Au ENPs (NIST 8012) | Sodium Citrate  | 28.6 ± 0.9 (DLS), <sup>b</sup> 26.9 ± 0.1 (SEM) <sup>b</sup>    | 48.17 ± 0.33                                                   | -40.4 ± 1.4                             | -43.6 ± 3.1                           |
| 60 nm Citrate Au ENPs (NIST 8013) | Sodium Citrate  | 56.6 ± 1.4 (DLS), <sup>b, c</sup> 54.9 ± 0.4 (SEM) <sup>b</sup> | 51.86 ± 0.64                                                   | -42.5 ± 3.2                             | -30.3 ± 1.1                           |
| 100 nm Citrate Au ENPs            | Sodium Citrate  | 104 ± 13 (TEM), <sup>a</sup> 101 ± 2 (DLS)                      | 52                                                             | -51.3 ± 0.9                             | -33.8 ± 4.7                           |
| 30 nm PEG Au ENPs                 | mPEG 5 kDa      | 32.7 ± 11.0 (TEM), <sup>a</sup> 51.7 ± 1.1 (DLS)                | 51                                                             | -16.8 ± 3.3                             | -8.51 ± 5.57                          |
| 60 nm PEG Au ENPs                 | mPEG 5 kDa      | 65.3 ± 12.3 (TEM), <sup>a</sup> 69.6 ± 1.3 (DLS)                | 53                                                             | -31.3 ± 3.1                             | -7.05 ± 2.45                          |
| 100 nm PEG Au ENPs                | mPEG 5 kDa      | 105 ± 14 (TEM), <sup>a</sup> 108 ± 2 (DLS)                      | 54                                                             | -36.1 ± 4.7                             | -13.1 ± 1.2                           |
| 30 nm PVP Au ENPs                 | PVP             | 29.7 ± 2.6 (TEM), <sup>a</sup> 46.5 ± 1.0 (DLS)                 | 50                                                             | -29.0 ± 2.2                             | -11.2 ± 1.6                           |
| 60 nm PVP Au ENPs                 | PVP             | 55.9 ± 7.9 (TEM), <sup>a</sup> 85.6 ± 1.0 (DLS)                 | 54                                                             | -33.3 ± 2.5                             | -8.07 ± 1.93                          |
| 100 nm PVP Au ENPs                | PVP             | 100.0 ± 7.4 (TEM), <sup>a</sup> 124 ± 2 (DLS)                   | 52                                                             | -28.0 ± 3.5                             | -5.58 ± 1.85                          |
| 10 nm PCD Au ENPs                 | Dendrons        | 16.3 ± 0.5 (DLS), 7.2 ± 2.1 (TEM) <sup>d</sup>                  | 330 ± 1                                                        | -2.93 ± 1.71                            | -10.1 ± 1.5                           |
| 2 nm Si ENPs                      | Amine           | 1.9 ± 0.3 (DLS), 1.9 ± 0.2 (TEM) <sup>e</sup>                   | 90 ± 1 <sup>e</sup>                                            | 13.8 ± 1.0                              | 1.1 ± 0.6                             |
| 55 nm PS ENPs                     | Amine           | 56.6 ± 0.9 (DLS), 51 ± 9 (SEM) <sup>f</sup>                     | 100 000 <sup>f</sup>                                           | 32.9 ± 2.2                              | 32.3 ± 3.3                            |

<sup>a</sup> Values are the mean ± 1 standard deviation of at least five measurements of a single sample for DLS measurements or 100 particles for TEM measurements. Transmission electron microscopy (TEM) sizes were provided by the manufacturer.

<sup>b</sup> Values are those provided in the Report of Investigation for reference material 8012 and 8013 and indicate the mean ± expanded uncertainty. The number of replicates tested for these analyses are in the Reports of Investigation.

<sup>c</sup> In addition to the data provided in the Report of Investigation, this sample was also analyzed on the same day as the other DLS measurements. This analysis yielded a result of 60.8 ± 0.9 (mean ± 1 standard deviation of at least three replicates).

<sup>d</sup> Data is from Cho, T. J.; MacCuspie, R. I.; Gigault, J.; Gorham, J. M.; Elliott, J. T.; Hackley, V. A., Highly Stable Positively Charged Dendron-Encapsulated Gold Nanoparticles. *Langmuir* **2014**, *30* (13), 3883-3893.

<sup>e</sup> The TEM value is from the NIST Report of Investigation for RM 8027. The TEM data is the mean  $\pm$  1 standard deviation of 560 particles. The DLS data is from NIST special publication 1200-12. The DLS and Si concentration data are the mean  $\pm$  1 standard deviation of three measurements.

<sup>f</sup> Data is from Elliott, J. T.; Rösslein, M.; Song, N. W.; Blaza, T.; Kinsner-Ovaskainen, A.; Maniratanachote, R.; Salit, M. L.; Petersen, E. J.; Sequeira, F.; Lee, J.; Rossi, F.; Hirsch, C.; Krug, H. F.; Suchaoin, W.; Wick, P., Toward achieving harmonization in a nano-cytotoxicity assay measurement through an interlaboratory comparison study. *Altex* **2017**, *34* (2), 389-398.

<sup>g</sup> Au mass fraction provided by the manufacturer for the commercial materials and in the Report of Investigation for reference material 8012 and 8013, respectively. For RM 8012 and RM 8013, the expanded uncertainty (95 % confidence interval) is calculated according to the ISO/JCGM Guide. For the PCD AuENPs, the values are mean  $\pm$  1 standard deviation (n=3) measured using inductively coupled plasma-mass spectrometry.

<sup>h</sup> Values are the mean  $\pm$  1 standard deviation of at least three replicates. Standard deviation values represent the propagated error for the measurements of the replicates and the standard deviation of the runs in each replicate measurement.

<sup>i</sup> For some samples analyzed on one day for this sample, agglomeration was observed followed by a rapid change in the zeta potential value. This result was observed using two different Malvern zetasizer instruments. These results were excluded from calculating the average values. The result from the second zetasizer instrument was  $10.5 \pm 1.1$  indicating the reproducibility of this result; this value is the mean  $\pm$  1 standard deviation of three replicates. Standard deviation values represent the propagated error for the measurements of the replicates and the standard deviation of the runs in each replicate measurement.
